# Supplementary material for: Identifying Persuasive Design Principles and Behavior Change Techniques Supporting End User Values and Needs in eHealth Interventions for Long-Term Weight Loss Maintenance: Qualitative Study
Source: PubMed Central journal article supplement (PMC7735908; doi:10.2196/22598), 2020-11-30
Supplement: jmir_v22i11e22598_app1.pdf [file jmir_v22i11e22598_app1.pdf]

## Multimedia Appendix 1

### Interview Guide End users (ie, people with obesity aiming to maintain weight)

|                                                    |                                                             |                                                                                                                               |
|----------------------------------------------------|-------------------------------------------------------------|-------------------------------------------------------------------------------------------------------------------------------|
| Understand daily life, needs and coping strategies | Activities and routines                                     | Daily routines<br>A typical day (eating & physical activity behaviors, sleep, stress)                                         |
|                                                    | Good and bad days / periods                                 | Characteristics and causes                                                                                                    |
|                                                    | Challenges & problems everyday life                         | Challenges or problems experienced in daily life                                                                              |
|                                                    | Coping strategies                                           | How do you deal with the challenges                                                                                           |
|                                                    |                                                             | What works and does not work                                                                                                  |
|                                                    | Values in life                                              | Most important to you (highest priority)                                                                                      |
|                                                    |                                                             | Most important reasons / Drivers to maintain lost weight                                                                      |
|                                                    | Motivation for change                                       | Motivation to change / lose weight                                                                                            |
|                                                    | Experienced health                                          | Health and wellbeing before and after weight loss /new habits                                                                 |
|                                                    | Behavior change                                             | What was difficult with the behavior change / new habits                                                                      |
|                                                    | Understand the weight maintenance problem                   | Could you describe: <ul style="list-style-type: none"> <li>- Everyday challenges</li> <li>- The biggest challenges</li> </ul> |
|                                                    | Social support                                              | From family, friends, work                                                                                                    |
|                                                    |                                                             | From healthcare professionals / Healthcare system                                                                             |
|                                                    | Earlier treatment                                           | Earlier experiences and current needs                                                                                         |
| Which needs have been met                          |                                                             |                                                                                                                               |
| What do you miss or what could be improved         |                                                             |                                                                                                                               |
| Needs behavior change and weight loss maintenance  | Unmet needs                                                 |                                                                                                                               |
|                                                    | What is important for you with respect to health and weight |                                                                                                                               |
|                                                    | What are the most important effects of the behavior change  |                                                                                                                               |
| Weight loss maintenance                            | Preventing weight regain                                    | What have you done                                                                                                            |
|                                                    |                                                             | Most important strategies / actions                                                                                           |
|                                                    |                                                             | How to manage / control impulses. What works and does not work.                                                               |
|                                                    |                                                             | Useful knowledge / information                                                                                                |
|                                                    |                                                             | New strategies that you learned, that worked                                                                                  |
|                                                    | Motivation and behavior change                              | How to stay motivated                                                                                                         |
|                                                    |                                                             | Experiences with continuing the new healthy habits / behaviors                                                                |
|                                                    |                                                             | What has been most challenging (physical, mental, social)                                                                     |
|                                                    |                                                             | Difficult phases in the change process (back to old habits), what did you learn                                               |
|                                                    |                                                             | Eating behavior, physical activity, sleeping pattern, energy, challenges?                                                     |
|                                                    |                                                             | What have worked / what helped you to succeed                                                                                 |
|                                                    | Needs to maintain weight                                    | Self-management strategies                                                                                                    |
|                                                    |                                                             | Support from a person vs. technology to maintain changes / weight                                                             |

|                                                  |                                                     |                                                                                                                     |
|--------------------------------------------------|-----------------------------------------------------|---------------------------------------------------------------------------------------------------------------------|
| <b>Technology</b>                                | <b>Technology experience and use</b>                | Use of different technologies                                                                                       |
|                                                  |                                                     | Use of technologies in relation to health and weight management (e.g., apps, trackers / wearables, blogs, internet) |
|                                                  |                                                     | Why do you use this or not                                                                                          |
|                                                  |                                                     | What makes you continue using it or not                                                                             |
|                                                  |                                                     | What do you like or don't like with the solutions                                                                   |
|                                                  |                                                     | Communication with healthcare professionals or peers through technology                                             |
|                                                  | <b>eHealth intervention weight loss maintenance</b> | Would an eHealth technology be useful (why/why not)?                                                                |
|                                                  |                                                     | What would be useful to you / not useful?                                                                           |
|                                                  |                                                     | How can an eHealth technology help in your everyday life (what, when, where)?                                       |
|                                                  |                                                     | Content & presentation of content                                                                                   |
|                                                  |                                                     | Design                                                                                                              |
|                                                  |                                                     | Needs for active use (look and feel)                                                                                |
|                                                  |                                                     | Privacy and security                                                                                                |
|                                                  |                                                     | How much time would you spend on the technology?<br>Barriers / facilitators for use?                                |
|                                                  | <b>End of interview</b>                             | What is the most important to consider when starting the development process?                                       |
| Anything missing or that has not been mentioned? |                                                     |                                                                                                                     |
| Other ideas or questions?                        |                                                     |                                                                                                                     |

### Interview Guide Other Stakeholders

|                                                                 |                                                                 |                                                                                                                                                                              |
|-----------------------------------------------------------------|-----------------------------------------------------------------|------------------------------------------------------------------------------------------------------------------------------------------------------------------------------|
| <b>Understand patient / end-user challenges and needs</b>       | <b>Own role and experience with the patient group.</b>          | What and how                                                                                                                                                                 |
|                                                                 | <b>Main problems / challenges within the field.</b>             | Why is this challenging? How can the problem be solved / challenges addressed?<br>Values and preferences.                                                                    |
|                                                                 | <b>Challenges &amp; problems</b>                                | Challenges or problems in relation to health care provision, weight loss maintenance, behavior change (e.g., diet, physical activity, stress, sleep). Stakeholders involved. |
|                                                                 | <b>Needs behavior change and weight loss maintenance</b>        | What do users need the most / unmet needs                                                                                                                                    |
|                                                                 |                                                                 | Key values and needs                                                                                                                                                         |
|                                                                 | <b>Patient / end-user challenges</b>                            | Most important patient challenges (question for help)                                                                                                                        |
|                                                                 |                                                                 | Most important reasons / Drivers to maintain lost weight                                                                                                                     |
|                                                                 | <b>Weight loss maintenance offerings / support / services</b>   | What can help end-users to maintain weight                                                                                                                                   |
|                                                                 | <b>How to improve health services to the patient group</b>      | Current vs future offerings                                                                                                                                                  |
|                                                                 | <b>Behavior change</b>                                          | What do users experience as difficult with the behavior change / new habits / weight loss maintenance                                                                        |
|                                                                 | <b>Understand the weight maintenance problem</b>                | Everyday challenges.<br>The biggest challenges users experience.                                                                                                             |
| <b>Preventing weight regain &amp; long-term behavior change</b> | Most important strategies / actions                             |                                                                                                                                                                              |
|                                                                 | How to manage / control impulses. What works and does not work. |                                                                                                                                                                              |
|                                                                 | Useful knowledge / information                                  |                                                                                                                                                                              |
|                                                                 | Motivation                                                      |                                                                                                                                                                              |

|                         |                                                                                                                       |                                                                                                                         |
|-------------------------|-----------------------------------------------------------------------------------------------------------------------|-------------------------------------------------------------------------------------------------------------------------|
| <b>Technology</b>       | <b>Technology use and experience</b>                                                                                  | Use of different technologies                                                                                           |
|                         |                                                                                                                       | Use of technologies in relation to health and weight management (e.g., apps, trackers / wearables, blogs, internet)     |
|                         |                                                                                                                       | Experience with use of technologies in health care provision                                                            |
|                         |                                                                                                                       | Experience with use of technologies for weight loss maintenance                                                         |
|                         |                                                                                                                       | What do you like or do not like with current solutions.<br>What can technology contribute with?<br>What do you wish?    |
|                         |                                                                                                                       | Communication with end-users / patients or other healthcare professionals through technology                            |
|                         |                                                                                                                       |                                                                                                                         |
|                         | <b>eHealth intervention weight loss maintenance</b>                                                                   | Would an eHealth technology be useful (why/why not)?                                                                    |
|                         |                                                                                                                       | In what way can an eHealth / digital technology help to sustain weight loss maintenance after initial weight loss? How? |
|                         |                                                                                                                       | In what way can eHealth / digital technology support behavior change and continuation of healthy habits? How?           |
|                         |                                                                                                                       | Content & presentation of content                                                                                       |
|                         |                                                                                                                       | Design                                                                                                                  |
|                         |                                                                                                                       | Needs for active use (look and feel)                                                                                    |
|                         |                                                                                                                       | Privacy and security                                                                                                    |
| <b>End of interview</b> | How does the technology fit in the current service offerings?<br>Added value? Barriers / facilitators implementation? |                                                                                                                         |
|                         | What is the most important to consider when starting the development process?                                         |                                                                                                                         |
|                         | Anything missing or that has not been mentioned?                                                                      |                                                                                                                         |
|                         | Other ideas or questions?                                                                                             |                                                                                                                         |
