# Supplementary material for: Identifying Persuasive Design Principles and Behavior Change Techniques Supporting End User Values and Needs in eHealth Interventions for Long-Term Weight Loss Maintenance: Qualitative Study
Source: PubMed Central journal article supplement (PMC7735908; doi:10.2196/22598), 2020-11-30
Supplement: jmir_v22i11e22598_app2.pdf [file jmir_v22i11e22598_app2.pdf]

## Multimedia Appendix 2 Design Elements Features Cards

|                                                                                                                                                                                    |                                                                                                                                                                                                                 |                                                                                                                                                                                                                  |                                                                                                                                                                                                                                  |                                                                                                                                                                                                                               |
|------------------------------------------------------------------------------------------------------------------------------------------------------------------------------------|-----------------------------------------------------------------------------------------------------------------------------------------------------------------------------------------------------------------|------------------------------------------------------------------------------------------------------------------------------------------------------------------------------------------------------------------|----------------------------------------------------------------------------------------------------------------------------------------------------------------------------------------------------------------------------------|-------------------------------------------------------------------------------------------------------------------------------------------------------------------------------------------------------------------------------|
|  <p><b>Goal-setting</b><br/>Set and follow own short and long-term goals</p>                      |  <p><b>Game elements</b><br/>Includes motivating &amp; funny gamification elements</p>                                         |  <p><b>Planning</b><br/>Plan e.g. one day, event, or specific period based on calendar function.</p>                            |  <p><b>Motivating messages</b><br/>Praise / positive messages on «bad days» or when almost reaching a target</p>                               |  <p><b>Social support virtual coach</b><br/>Provides support on difficult days, or when performing healthy habits / behavior!</p>          |
|  <p><b>Reminders</b><br/>Reminders about targets or habits to work on</p>                         |  <p><b>Wearables / sensors</b><br/>Automatic tracking, measuring &amp; registration</p>                                        |  <p><b>Practice habits</b><br/>Train on new &amp; just established habits, to learn new routines &amp; make healthy choices</p> |  <p><b>Suggestions</b><br/>Tips on healthy habits and strategies, e.g., diet, activity, what to do when hungry</p>                             |  <p><b>Train on situations / challenges</b><br/>Support training on «tempting» / difficult situations</p>                                  |
|  <p><b>Avatar</b><br/>Make own avatar based on oneself or preferences</p>                       |  <p><b>Personalization</b><br/>Personal preferences: look and feel or settings (e.g., feedback, reminders etc.)</p>          |  <p><b>Social support healthcare personnel</b><br/>Get feedback &amp; ask questions</p>                                       |  <p><b>Rewards</b><br/>Points and trophies when reaching goals &amp; target</p>                                                              |  <p><b>Metaphors</b><br/>Motivating metaphors e.g., a garden of flowers: every time a target is reached a flower grow</p>                |
|  <p><b>Self-monitoring</b><br/>Registrations see connections &amp; possibilities for change</p> |  <p><b>Social support other users</b><br/>Communication with other users, sharing experiences, competition, cooperation.</p> |  <p><b>Visualization</b><br/>Presentation of content through animations, graphs, cartoons etc.</p>                            |  <p><b>Tailoring</b><br/>Tailoring / adapts based on personal use, e.g., content &amp; tasks based on earlier preferences, time, place.</p> |  <p><b>Feedback</b><br/>Provides feedback, e.g. on past achievements, rewards and progression in relation on targets &amp; behavior.</p> |
