# Supplementary material for: Identifying Persuasive Design Principles and Behavior Change Techniques Supporting End User Values and Needs in eHealth Interventions for Long-Term Weight Loss Maintenance: Qualitative Study
Source: PubMed Central journal article supplement (PMC7735908; doi:10.2196/22598), 2020-11-30

**Multimedia Appendix 4**  
**Infographics to visualize the demographics of included end users.**

**Gender**

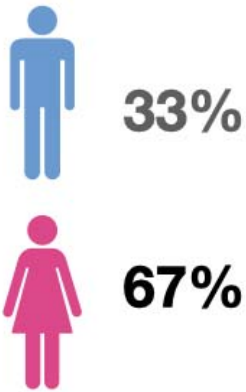

**Onset of obesity**

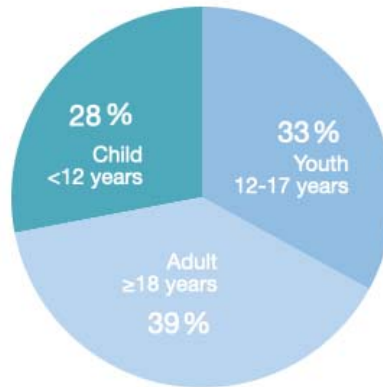

**Age**

Median age: 53 years  
 Range: 24-70 years

**Employment status**

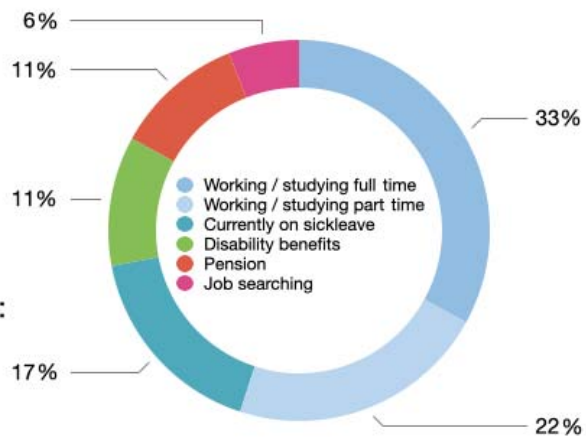

**BMI**

BMI  $\geq 30$  kg/m<sup>2</sup> before weight loss:  
 100% of the participants

**Education level**

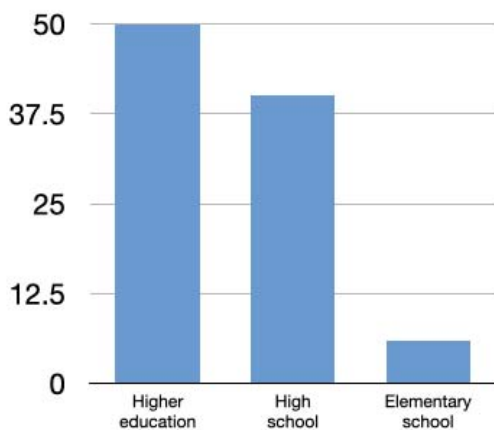

**Use of health apps**

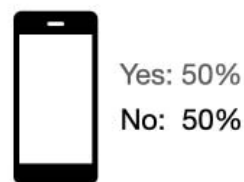

Supplement: jmir_v22i11e22598_app4.pdf [file jmir_v22i11e22598_app4.pdf]
